# Supplementary material for: Generation of knockout rabbits with X-linked severe combined immunodeficiency (X-SCID) using CRISPR/Cas9
Source: PubMed Central journal article supplement (PMC7305219; doi:10.1038/s41598-020-66780-6), 2020-06-19

1 **Generation of knockout rabbits with X-linked severe combined**  
2 **immunodeficiency (X-SCID) using CRISPR/Cas9**

3 Yoshiko Hashikawa<sup>1, 2, 3</sup>, Ryuhei Hayashi<sup>1, 3\*</sup>, Masaru Tajima<sup>2, 4</sup>, Toru Okubo<sup>3</sup>,  
4 Shohei Azuma<sup>1</sup>, Mitsuru Kuwamura<sup>5</sup>, Naofumi Takai<sup>6</sup>, Yasuyuki Osada<sup>6</sup>, Yayoi  
5 Kunihiro<sup>4</sup>, Tomoji Mashimo<sup>4, 7\*</sup>, Kohji Nishida<sup>1, 8</sup>

6  
7 <sup>1</sup> Department of Ophthalmology, Osaka University Graduate School of Medicine,  
8 Osaka, Japan

9 <sup>2</sup> Institute of Large Laboratory Animal Sciences, Osaka University Graduate  
10 School of Medicine, Osaka, Japan

11 <sup>3</sup> Department of Stem Cells and Applied Medicine, Osaka University Graduate  
12 School of Medicine, Osaka, Japan

13 <sup>4</sup> Institute of Experimental Animal Science, Graduate School of Medicine, Osaka  
14 University, Osaka, Japan

15 <sup>5</sup> Osaka Prefecture University School of Life and Environmental Sciences  
16 Veterinary pathology, Osaka, Japan

17 <sup>6</sup> KITAYAMA LABES CO.,LTD., Nagano, Japan

18 <sup>7</sup>Laboratory Animal Research Center, Institute of Medical Science, The University  
19 of Tokyo, Tokyo, Japan

20 <sup>8</sup> Integrated Frontier Research for Medical Science Division, Institute for Open  
21 and Transdisciplinary Research Initiatives (OTRI), Osaka University, Osaka,  
22 Japan

23  
24 Correspondence and requests for materials should be addressed to R.H. (email:  
25 ryuhei.hayashi@ophthal.med.osaka-u.ac.jp) or to T.M. (email: mashimo@ims.u-  
26 tokyo.ac.jp)

# Supplementary Figure 1.

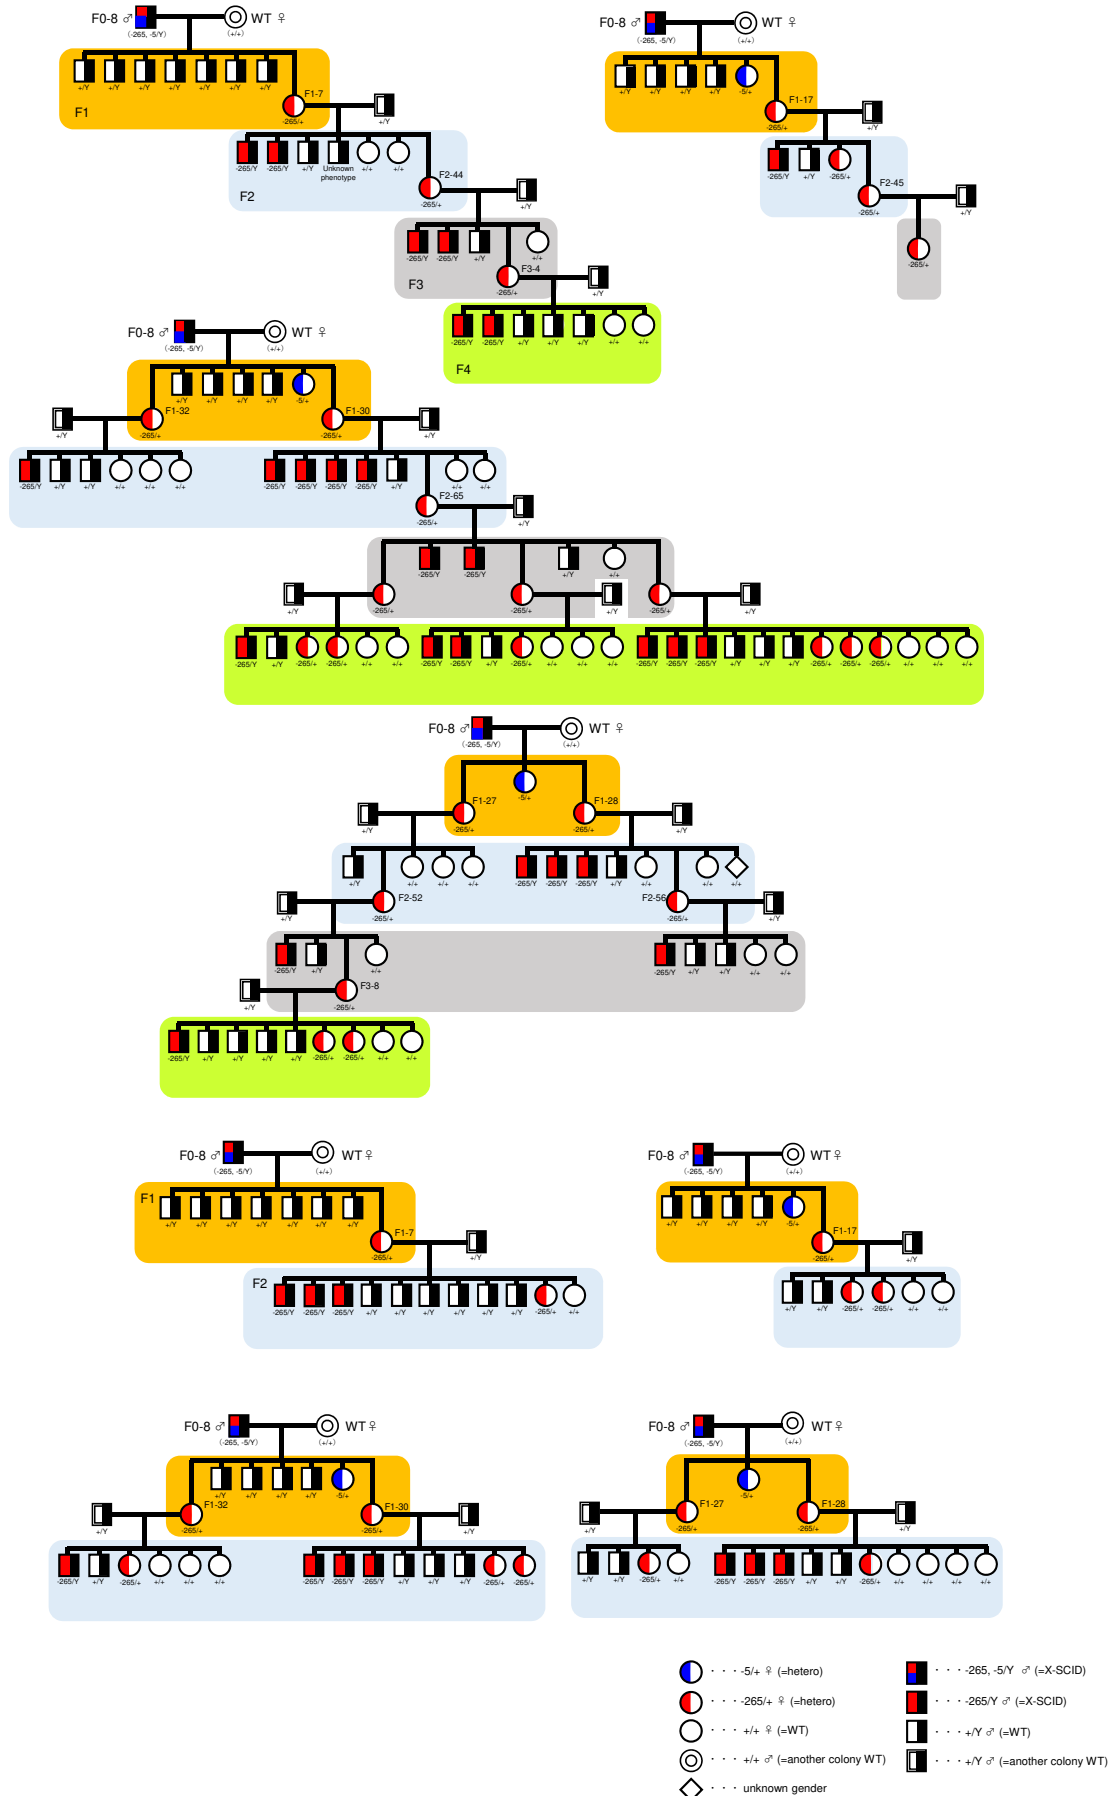

# Supplementary Figure 2.

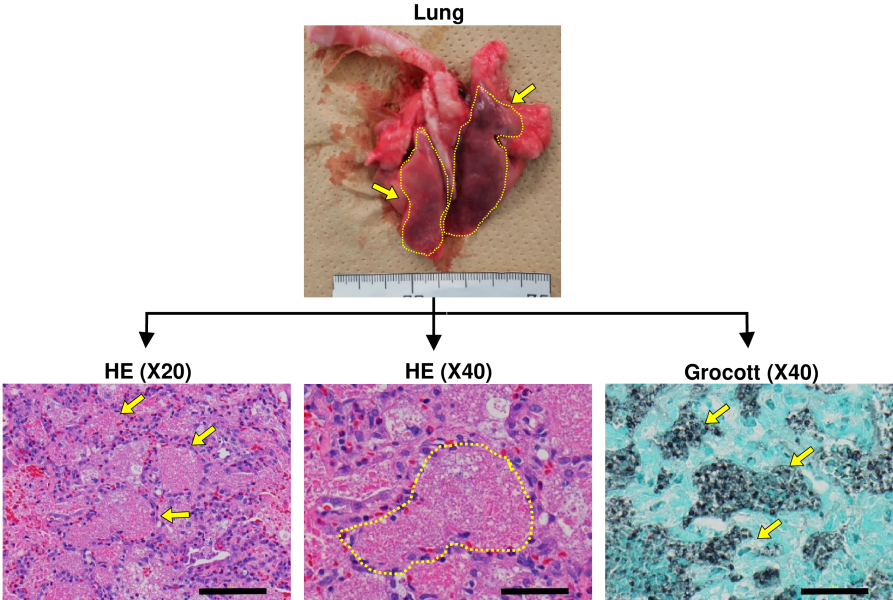

# Supplementary Figure 3.

a. appendix

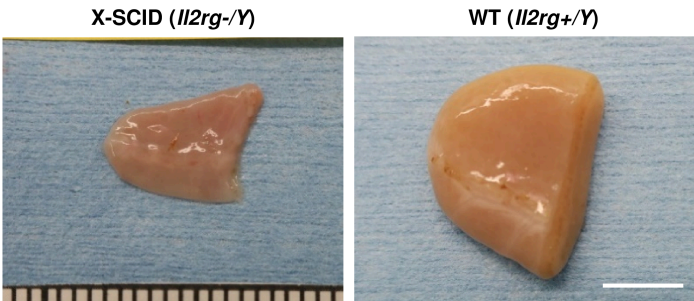

b. Mesenteric lymph node

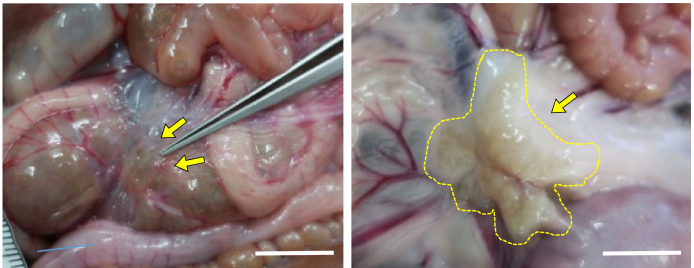

c. Peyer's patches

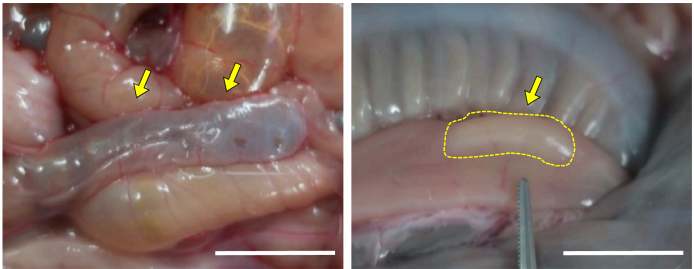

# Supplementary Figure 4.

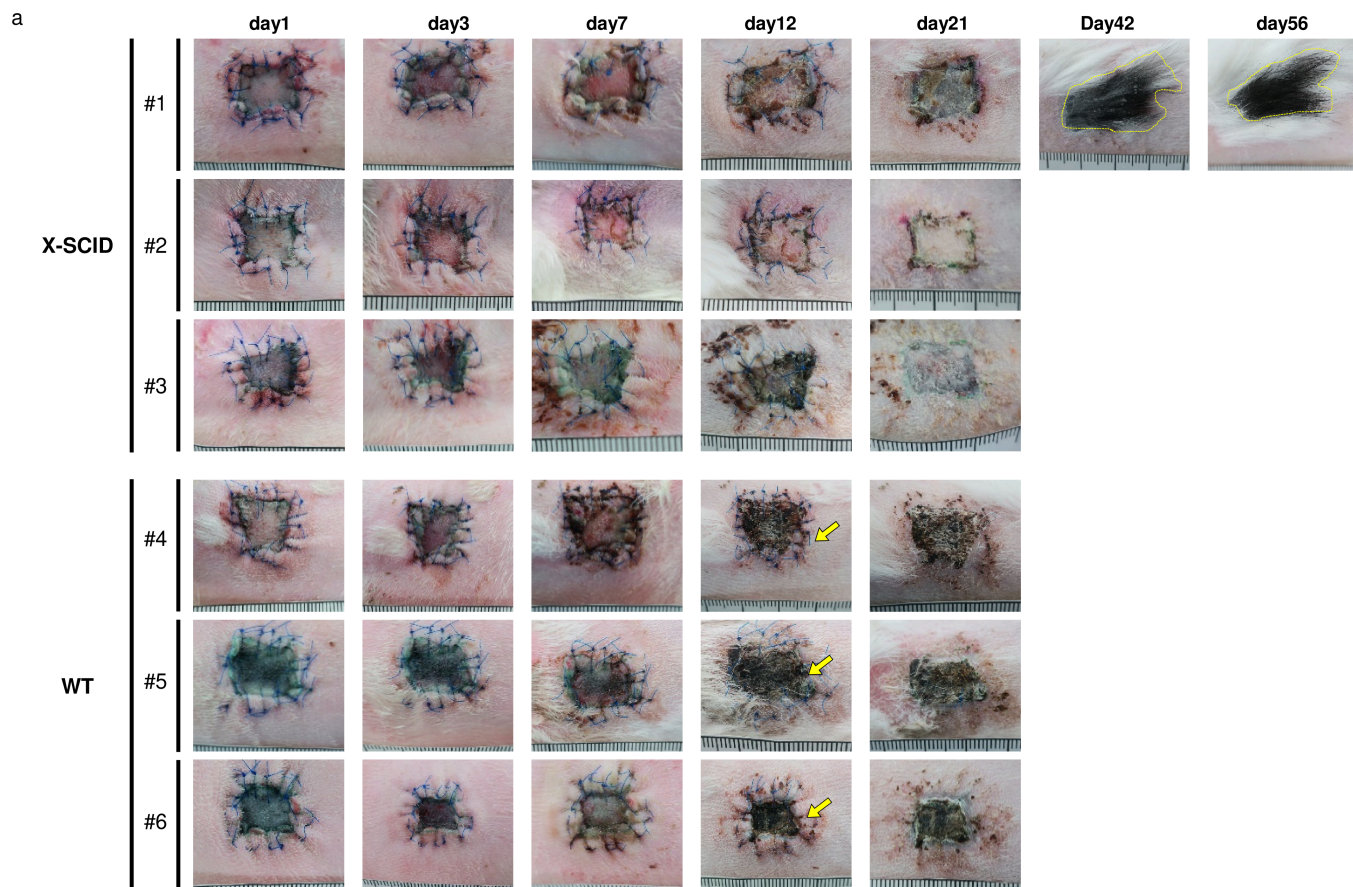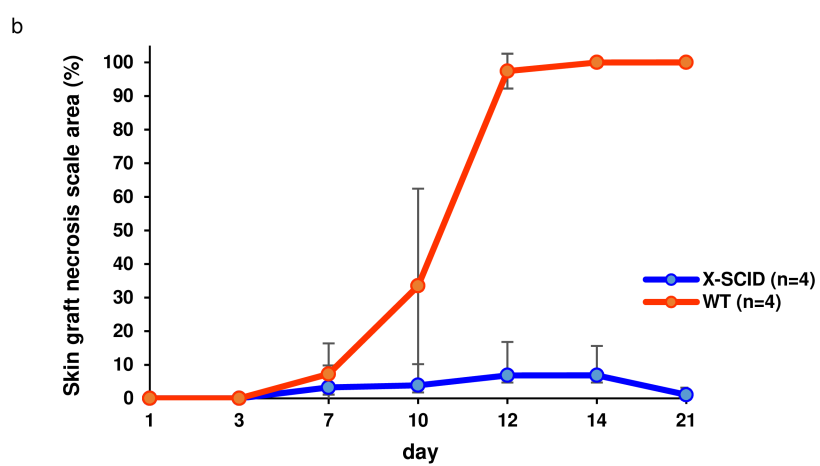

# Supplementary Table 1.

| parent          |   |            | pups generation | <i>Ii2rg</i> genotype |           |            |           | total |
|-----------------|---|------------|-----------------|-----------------------|-----------|------------|-----------|-------|
| mutant          | × | WT         |                 | male ♂                |           | female ♀   |           |       |
|                 |   |            |                 | X-SCID (%)            | WT (%)    | Hetero (%) | WT (%)    |       |
| ♂<br>(-265, -5) | × | ♀<br>(+/+) | F1              | 0 (0)                 | 15 (50)   | 15 (50)    | 0 (0)     | 30    |
| ♀<br>(-265/+)   | × | ♂<br>(+/+) | F2              | 21 (26.3)             | 23 (28.8) | 14 (17.5)  | 22 (27.5) | 80    |
| ♀<br>(-265/+)   | × | ♂<br>(+/+) | F3              | 6 (27.3)              | 5 (22.7)  | 6 (27.3)   | 5 (22.7)  | 22    |
| ♀<br>(-265/+)   | × | ♂<br>(+/+) | F4              | 8 (19.0)              | 13 (31.0) | 9 (21.4)   | 12 (28.6) | 42    |

## Supplementary Table 2.

| Spleen weight (g)                            |            |
|----------------------------------------------|------------|
| X-SCID ( <i>Il2rg</i> <sup>-Y</sup> )<br>n=4 | 1.2 ± 0.09 |
| WT ( <i>Il2rg</i> <sup>+Y</sup> )<br>n=5     | 1.0 ± 0.09 |

## Supplementary Table 3.

| Gene                | Sequence | GeneBank accesstion No. |              |
|---------------------|----------|-------------------------|--------------|
| <i>Ii2rg</i> (gDNA) | Forward  | AGGATCCTCACACCCAGTGA    | XM-008272760 |
|                     | Reverse  | TAAGCTTCCTCGTGGTCTGC    |              |
|                     | Forward  | CCTGGGTCCCTCAGTGTTT     | XM-008272760 |
|                     | Reverse  | TGTCTCCATGGGTTAGGTGC *  |              |
| <i>Ii2rg</i> (mRNA) | Forward  | GAAGAGGAAGCGCCATGTTG    | XM-008272760 |
|                     | Reverse  | TTAAGCTTCCTCGTGGTCTGC   |              |
| <i>GAPDH</i>        | Forward  | GGAGAAAGCTGCTAA         | L23961       |
|                     | Reverse  | ACGACCTGGTCCCTCGGTGTA   |              |

\* The primer was designed based on our sequencing results of Japanese White rabbit.



28 **Supplementary Figure and Table Legends**

29

30 **Supplementary Figure 1. Pedigrees generated from sequence analyses of**  
31 **the F0 founder, F1, F2, F3, and F4 progeny.**

32

33 **Supplementary Figure 2. X-SCID rabbit abnormality lung.**

34 Macroscopic and Histological analysis of the lung abnormality area (yellow circled  
35 area) of X-SCID rabbit (25 weeks old, male) stained with H&E and Grocott. HE  
36 (X20) scale bar is 100µm, HE (X40) and Grocott (X40) scale bar is 50µm.

37

38 **Supplementary Figure 3. Phenotype during organogenesis in X-SCID**  
39 **rabbits.**

40 **(a)** Histological analysis of the appendix of X-SCID and WT rabbits (25 weeks  
41 old, male). Scale bar, 5 mm. **(b)** Histological analysis of the mesenteric lymph  
42 node (yellow circled area) of X-SCID and WT rabbits (25 weeks old, male).  
43 Scale bar, 10 mm. **(c)** Histological analysis of the Peyer's patches (yellow  
44 circled area) of X-SCID and WT rabbits (25 weeks old, male). Scale bar, 10  
45 mm.

46

47 **Supplementary Figure 4. Allogeneic skin transplantation.**

48 **(a)** Morphological analysis of temporal changes in the skin graft. The area  
49 demarcated by the yellow circled area shows black hair, characteristic of Dutch  
50 rabbits. The yellow arrow indicates darkening of the transplanted skin. **(b)**  
51 Temporal changes in the area of skin graft necrosis.

52

53 **Supplementary Table 1. Number of offspring from F1 to F4 generations in**  
54 **the *Il2rg* genotype.**

55

56 **Supplementary Table 2. Weight of spleen.**

57

58 **Supplementary Table 3. Primer sequences.**

59

## Supplementary Gel Images for

60 **Generation of knockout rabbits with X-linked severe combined**  
61 **immunodeficiency (X-SCID) using CRISPR/Cas9**

62 Yoshiko Hashikawa<sup>1, 2, 3</sup>, Ryuhei Hayashi<sup>1, 3\*</sup>, Masaru Tajima<sup>2, 4</sup>, Toru Okubo<sup>3</sup>,  
63 Shohei Azuma<sup>1</sup>, Mitsuru Kuwamura<sup>5</sup>, Naofumi Takai<sup>6</sup>, Yasuyuki Osada<sup>6</sup>, Yayoi  
64 Kunihiro<sup>4</sup>, Tomoji Mashimo<sup>4, 7\*</sup>, Kohji Nishida<sup>1, 8</sup>

65

66 <sup>1</sup> Department of Ophthalmology, Osaka University Graduate School of Medicine,  
67 Osaka, Japan

68 <sup>2</sup> Institute of Large Laboratory Animal Sciences, Osaka University Graduate  
69 School of Medicine, Osaka, Japan

70 <sup>3</sup> Department of Stem Cells and Applied Medicine, Osaka University Graduate  
71 School of Medicine, Osaka, Japan

72 <sup>4</sup> Institute of Experimental Animal Science, Graduate School of Medicine, Osaka  
73 University, Osaka, Japan

74 <sup>5</sup> Osaka Prefecture University School of Life and Environmental Sciences  
75 Veterinary pathology, Osaka, Japan

76 <sup>6</sup> KITAYAMA LABES CO.,LTD., Nagano, Japan

77 <sup>7</sup>Laboratory Animal Research Center, Institute of Medical Science, The University  
78 of Tokyo, Tokyo, Japan

79 <sup>8</sup> Integrated Frontier Research for Medical Science Division, Institute for Open  
80 and Transdisciplinary Research Initiatives (OTRI), Osaka University, Osaka,  
81 Japan

82

83 Correspondence and requests for materials should be addressed to R.H. (email:  
84 ryuhei.hayashi@ophthal.med.osaka-u.ac.jp) or to T.M. (email: mashimo@ims.u-  
85 tokyo.ac.jp)

86

Area of interest are highlighted by a white square.  
Labels correspond to those in the main paper.

Figure 1a

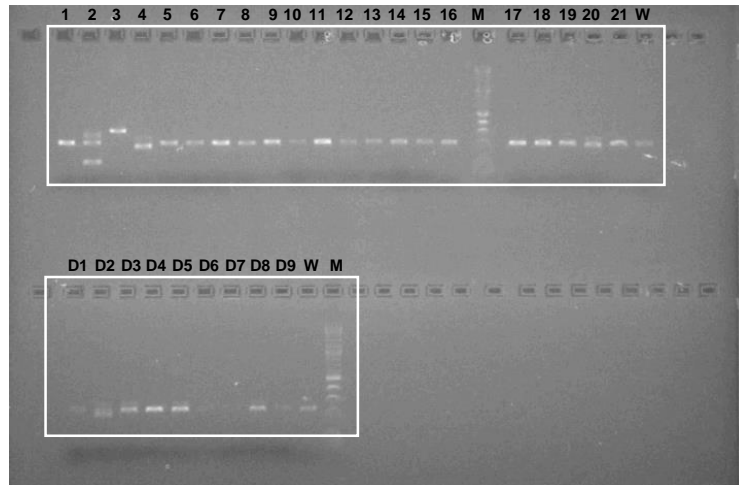

Figure 3c

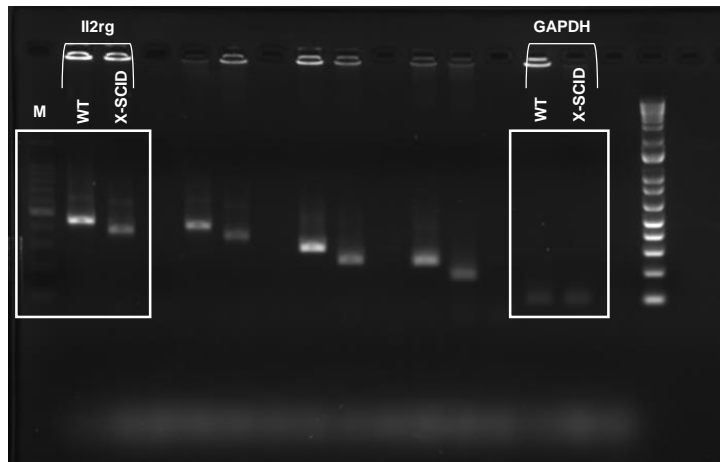

Supplement: 41598_2020_66780_MOESM1_ESM.pdf [file 41598_2020_66780_MOESM1_ESM.pdf]
